# Supplementary material
Source: PubMed Central journal article supplement (PMC5742074)
Supplement: NIHMS894470-supplement-1.pdf [file NIHMS894470-supplement-1.pdf]

**Table S1: Association of baseline deoxycholic acid greater than 58 ng/mL (median level) with baseline bone mineral density (n = 59)**

|            | $\beta$ -estimate (95% CI) | P-value |
|------------|----------------------------|---------|
| Unadjusted | 1.11 (-6.06 to 8.28)       | 0.8     |
| Model 1    | 0.95 (-6.54 to 8.44)       | 0.8     |
| Model 2    | 3.24 (-4.62 to 11.10)      | 0.4     |
| Model 3    | 3.64 (-4.47 to 11.75)      | 0.4     |
| Model 4    | 3.67 (-4.99 to 12.33)      | 0.4     |
| Model 5    | 3.52 (-5.69 to 12.73)      | 0.5     |

Model 1: unadjusted model + age

Model 2: model 1 + sex, race, body mass index, diabetes, hypertension, coronary artery disease

Model 3: model 2 + eGFR

Model 4: model 3 + calcium, phosphate

Model 5: model 4 + intact parathyroid hormone, fibroblast growth factor 23, treatment group (active vs. placebo)
