# Supplementary material
Source: PubMed Central journal article supplement (PMC5742074)
Supplement: NIHMS894470-supplement-2.pdf [file NIHMS894470-supplement-2.pdf]

**Table S2: Association of baseline log<sub>10</sub>-transformed deoxycholic acid (a continuous variable) with baseline bone mineral density (n = 59)**

|            | $\beta$ -estimate (95% CI) | P-value |
|------------|----------------------------|---------|
| Unadjusted | -1.18 (-8.53 to 6.17)      | 0.8     |
| Model 1    | -1.39 (-8.52 to 6.14)      | 0.7     |
| Model 2    | 0.90 (-8.86 to 8.66)       | 0.8     |
| Model 3    | 1.09 (-6.85 to 9.03)       | 0.6     |
| Model 4    | 1.09 (-6.97 to 9.15)       | 0.8     |
| Model 5    | 2.15 (-7.10 to 11.40)      | 0.7     |

Model 1: unadjusted model + age

Model 2: model 1 + sex, race, sex, race, body mass index, diabetes, hypertension, coronary artery disease

Model 3: model 2 + eGFR

Model 4: model 3 + calcium, phosphate

Model 5: model 4 + intact parathyroid hormone, fibroblast growth factor 23, treatment group (active vs. placebo)
